# Supplementary material
Source: Springer Nature journal article supplement (https://www.springermedizin.de/resource/supplementary/12968_2012_3286_MOESM22_ESM.pdf/9583546)

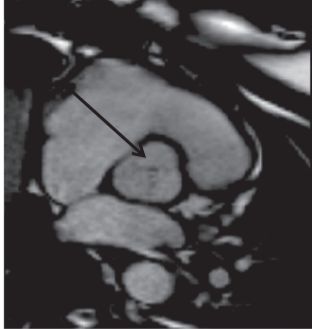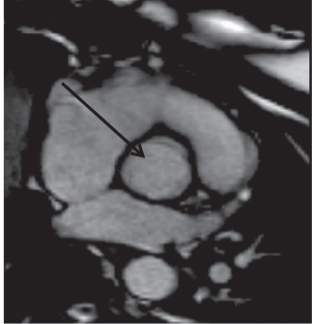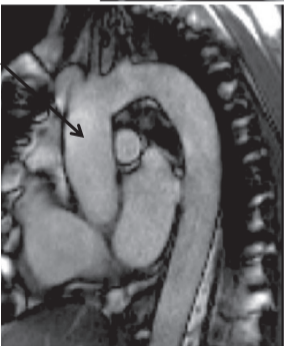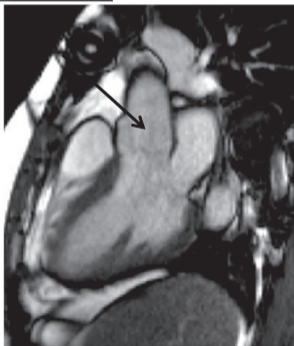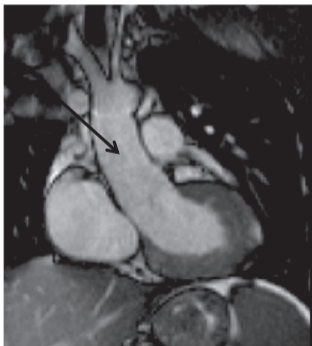

Supplement: MOESM22 [file 9583546]
